## Books Received

| Title & Edition                                                                                                                                                               | Author/Editor                          | Publisher                                                                           | Pages | Price   |
|-------------------------------------------------------------------------------------------------------------------------------------------------------------------------------|----------------------------------------|-------------------------------------------------------------------------------------|-------|---------|
|                                                                                                                                                                               |                                        | Address, Name, Year                                                                 |       |         |
| <b>The Lung: Structure, Function and Disease</b><br>(IAP Monograph #19)                                                                                                       | W. M. Thurlbeck<br>(editor)            | Baltimore<br>Williams and Wilkins<br>1978                                           | 332   | \$34.00 |
| <i>Lectures from the Long Course on Recent Advances in Pulmonary Pathology of the International Academy of Pathology.</i>                                                     |                                        |                                                                                     |       |         |
| <b>Hazards of Medication</b><br>Second edition                                                                                                                                | E. W. Martin                           | Philadelphia<br>J. B. Lippincott<br>1978                                            | 686   | \$39.50 |
| <i>Up-to-date information about the pitfalls of drug therapy.</i>                                                                                                             |                                        |                                                                                     |       |         |
| <b>Outpatient Anesthesia</b>                                                                                                                                                  | B. R. Brown                            | Philadelphia<br>F. A. Davis<br>1978                                                 | 96    | PNS     |
| <i>Nine chapters describing facilities, personnel, economics, patient selection and care, techniques, drug selection and an outpatient pain therapy service.</i>              |                                        |                                                                                     |       |         |
| <b>Relief of Intractable Pain</b>                                                                                                                                             | M. Swerdlow                            | Amsterdam<br>Elsevier<br>1978                                                       | 338   | \$61.50 |
| <i>Reflects the advances in what has been referred to as medicine's new growth industry.</i>                                                                                  |                                        |                                                                                     |       |         |
| <b>Regional Blocks for Nurse Anesthetists</b>                                                                                                                                 | P. A. Roberts                          | Springfield, Ill.<br>Charles C Thomas<br>1978                                       | 111   | \$ 9.75 |
| <i>Concentrates on aspects of the subject of practical value to the nurse anesthetist or student.</i>                                                                         |                                        |                                                                                     |       |         |
| <b>Beyond Malpractice: Compensation for Medical Injuries</b>                                                                                                                  | National Academy of Sciences           | Washington, D. C.<br>National Academy of Sciences/<br>Institute of Medicine<br>1978 | 88    | \$ 6.50 |
| <i>Indicates the necessity for a change in focus from the narrow problem of medical negligence to the broader context of equitable compensation for all medical injuries.</i> |                                        |                                                                                     |       |         |
| <b>The Caval Catheter</b>                                                                                                                                                     | C. Burri<br>F. W. Ahnefeld             | Secaucus, N. J.<br>Springer-Verlag New York Inc.<br>1978                            | 81    | \$14.00 |
| <b>Platelets: A Multidisciplinary Approach</b>                                                                                                                                | G. De Gaetano<br>S. Garattini          | New York<br>Raven Press<br>1978                                                     | 502   | \$36.00 |
| <b>Year Book of Anesthesia 1978</b>                                                                                                                                           | Eckenhoff/Bart<br>Brunner/Holley/Linde | Chicago<br>Year Book Medical Publishers<br>1978                                     | 352   | PNS     |
| <i>Reviews the literature to November 1977.</i>                                                                                                                               |                                        |                                                                                     |       |         |
| <b>The Psychology of Pain</b>                                                                                                                                                 | R. A. Sternbach                        | New York<br>Raven Press<br>1978                                                     | 282   | \$19.50 |
| <i>Ten chapters and 13 authors systematically review and gather in one volume references previously widely scattered.</i>                                                     |                                        |                                                                                     |       |         |
| <b>Practical Anesthetic Pharmacology</b>                                                                                                                                      | R. Attia<br>A. Grogono                 | New York<br>Appleton-Century-Crofts<br>1978                                         | 292   | \$21.50 |
| <i>A compact text for the trainee and practitioner, consisting of 16 brief reviews, each followed by tables of facts.</i>                                                     |                                        |                                                                                     |       |         |
